# Supplementary material for: Synthesis of cesium lead bromide nanoparticles by the ultrasonic bath method: A polar-solvent-free approach at room temperature
Source: Royal Society of Chemistry journal article supplement (doi:10.1039/d2dt03689d), 2022-11-17
Supplement: d2dt03689d1.pdf [file d2dt03689d1.pdf]

## Synthesis of Cesium lead bromide nanoparticles by ultrasonic bath: A polar-solvent-free approach at room temperature

Govind B. Nair<sup>1\*</sup>, R. Krishnan<sup>2</sup>, Arno Janse van Vuuren<sup>3</sup>, H. C. Swart<sup>1#</sup>

<sup>1</sup>*Department of Physics, University of the Free State, P. O. Box 339, Bloemfontein 9300, South Africa.*

<sup>2</sup>*Extreme Light Infrastructure-Nuclear Physics (ELI-NP), 'Horia Hulubei' National R&D Institute for Physics and Nuclear Engineering (IFIN-HH), 077125 Măgurele, Ilfov, Romania*

<sup>3</sup>*Centre for HRTEM, Nelson Mandela University, Port Elizabeth, 6001, South Africa*

\*Corresponding author Email : : [govind1291@yahoo.com](mailto:govind1291@yahoo.com) ; [Nair.GB@ufs.ac.za](mailto:Nair.GB@ufs.ac.za)

#Corresponding author Email : : [swarthc@ufs.ac.za](mailto:swarthc@ufs.ac.za)

### Supplementary Information File

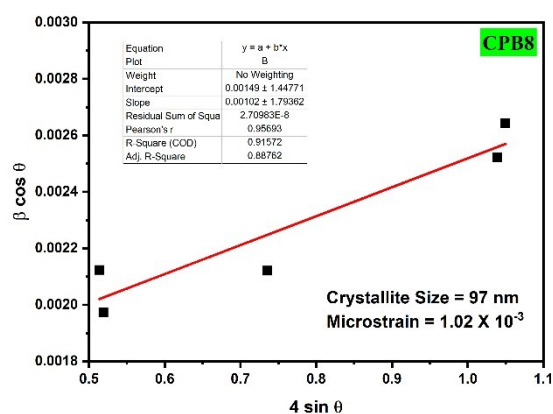

Fig. S1 Williamson-Hall (W-H) plot of CPB8 NPs.

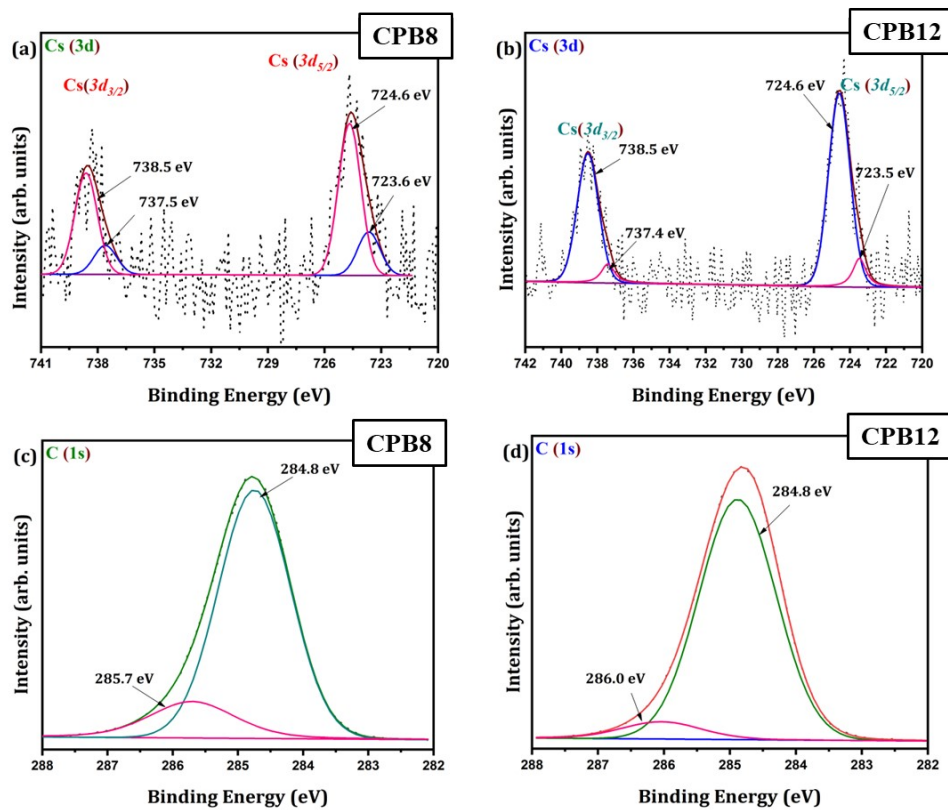

**Fig. S2** Narrow scan XPS spectra of (a, b) Cs 3d, (c, d) C 1s regions in the CPB8 and CPB12 NPs, respectively.

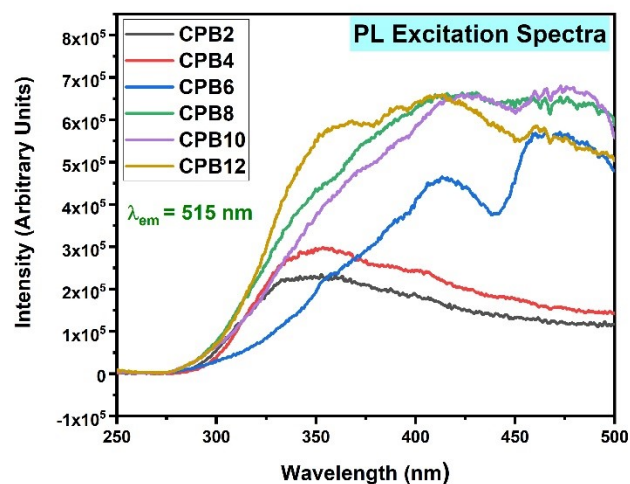

**Fig. S3** PL excitation spectra of the cesium lead bromide NPs prepared under different durations of ultrasonication.

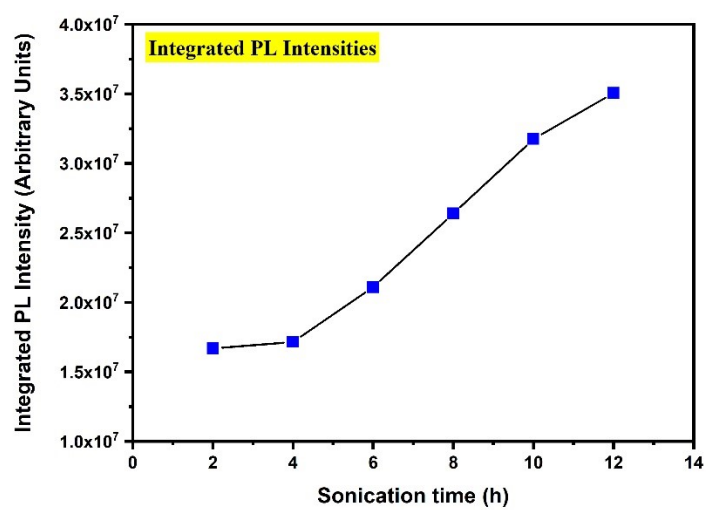

**Fig. S4** Variation of integrated PL intensity of CPB NPs versus the sonication time.

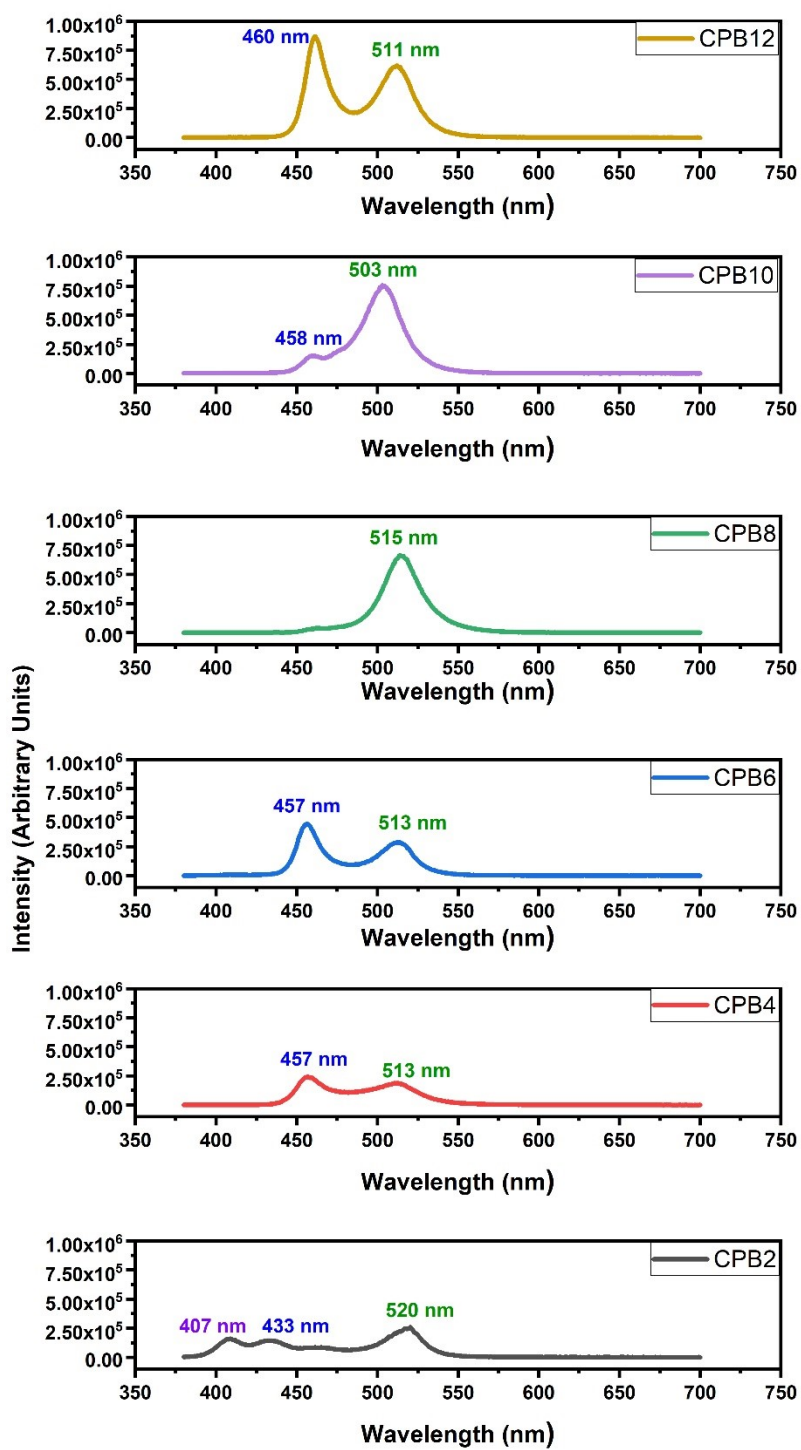

Fig. S5 PL emission spectra of the cesium lead bromide NPs excited at 365 nm.

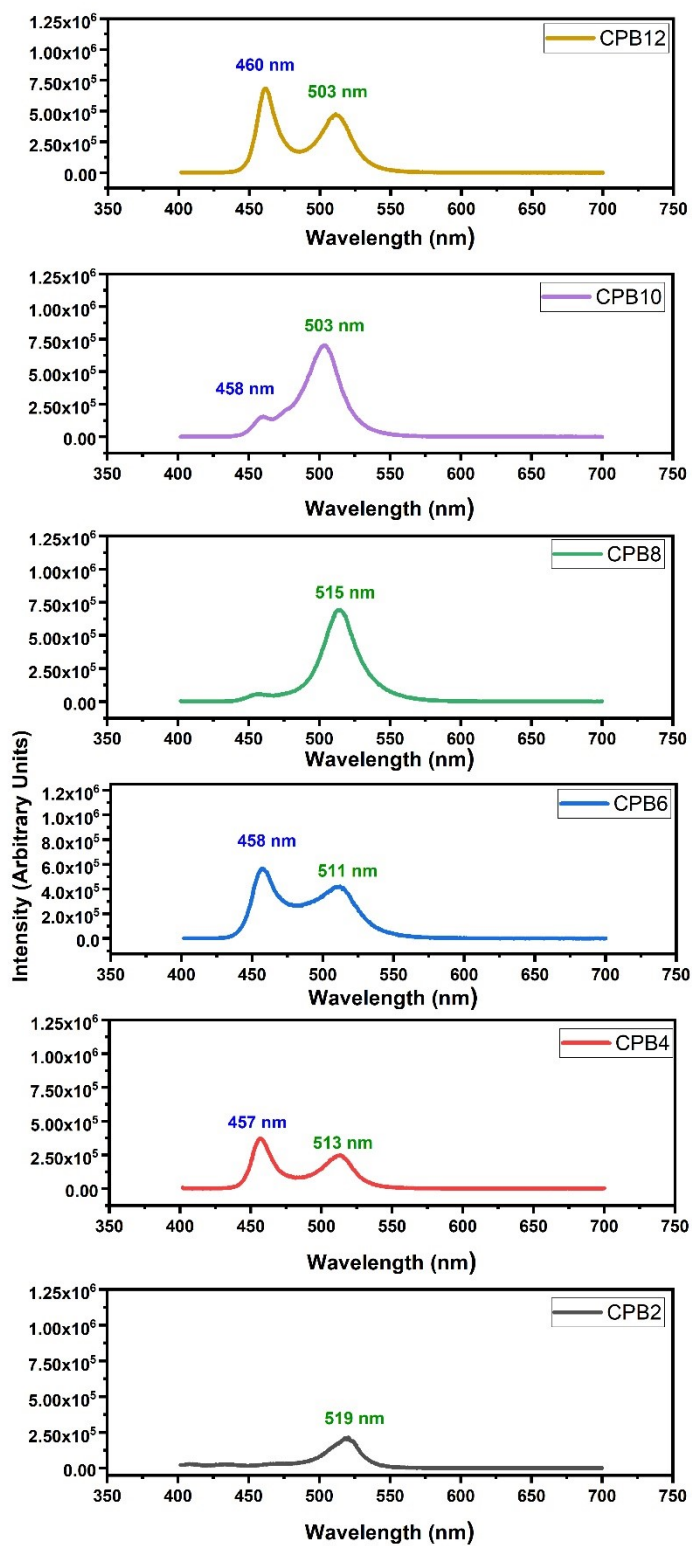

Fig. S6 PL emission spectra of the cesium lead bromide NPs excited at 400 nm.

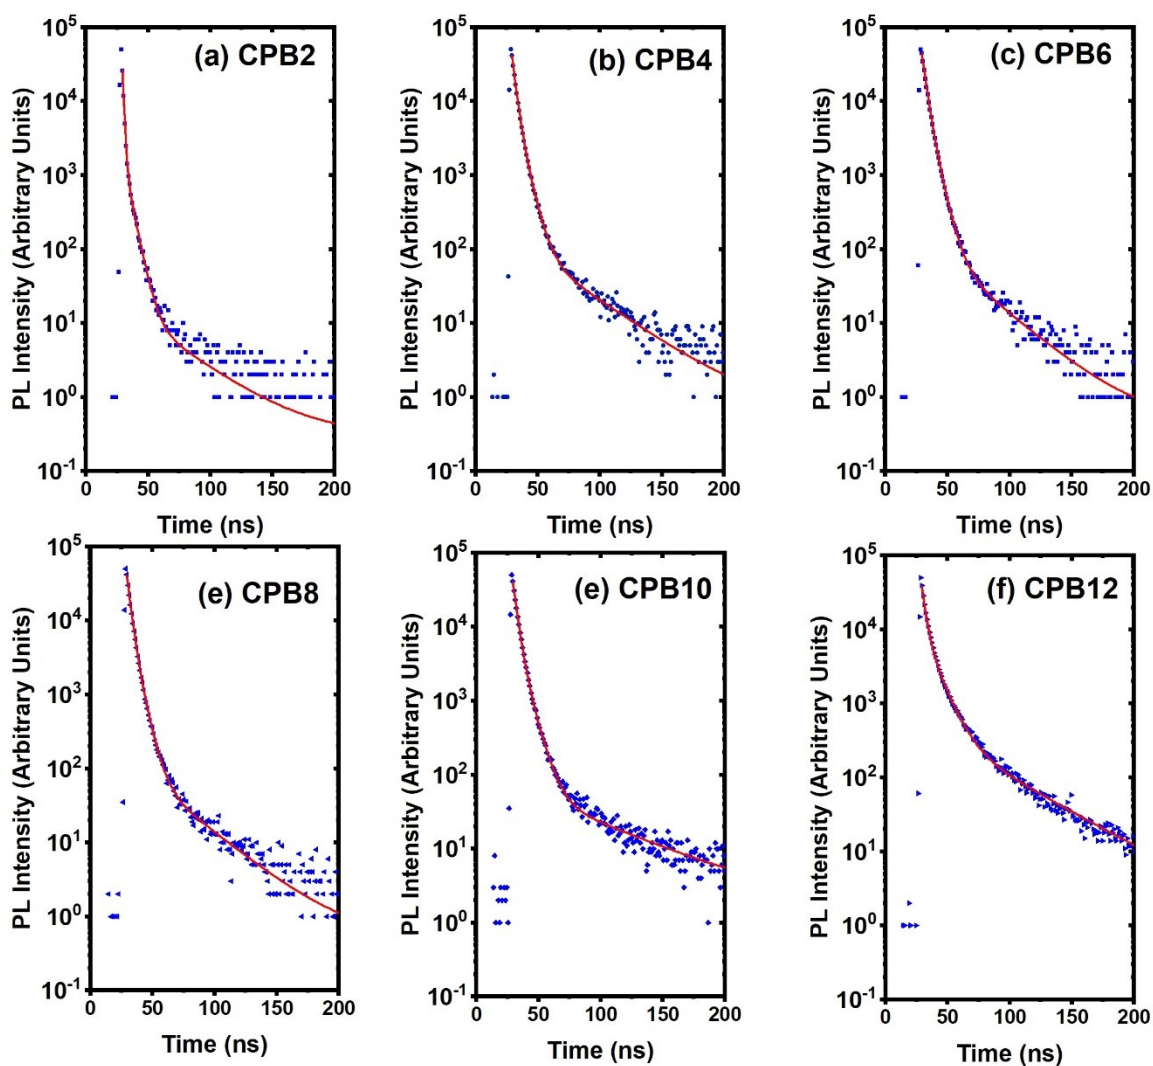

**Fig. S7** PL decay curves for **(a)** CPB2, **(b)** CPB4, **(c)** CPB6, **(d)** CPB8, **(e)** CPB10 and **(f)** CPB12 NPs excited at 360 nm and monitored for their blue emission peak.

**Table S1** Best fit parameters of PL decay curves for the green emission bands of **(a)** CPB2, **(b)** CPB4, **(c)** CPB6, **(d)** CPB8, **(e)** CPB10 and **(f)** CPB12 NPs.

| Sr. No.    | Decay time Parameters | Decay time Values (ns) | Coefficients | Coefficient values | Relative % | Average lifetime (ns) | Goodness of Fitting |
|------------|-----------------------|------------------------|--------------|--------------------|------------|-----------------------|---------------------|
| <b>(a)</b> | <b>CPB2</b>           |                        |              |                    |            |                       |                     |
|            | $\tau_1$              | 5.86                   | $A_1$        | 36388.56           | 42.53      | 4.119                 | 1.179               |
|            | $\tau_2$              | 32.06                  | $A_2$        | 3006.63            | 19.23      |                       |                     |
|            | $\tau_3$              | 181.42                 | $A_3$        | 585.94             | 21.17      |                       |                     |
|            | $\tau_4$              | 972.91                 | $A_4$        | 88.00              | 17.08      |                       |                     |

|            |              |         |       |          |       |        |       |
|------------|--------------|---------|-------|----------|-------|--------|-------|
| <b>(b)</b> | <b>CPB4</b>  |         |       |          |       |        |       |
|            | $\tau_1$     | 6.36    | $A_1$ | 36632.21 | 38.51 | 4.470  | 1.239 |
|            | $\tau_2$     | 28.82   | $A_2$ | 5679.32  | 27.05 |        |       |
|            | $\tau_3$     | 151.56  | $A_3$ | 800.54   | 20.05 |        |       |
|            | $\tau_4$     | 887.98  | $A_4$ | 98.14    | 14.40 |        |       |
| <b>(c)</b> | <b>CPB6</b>  |         |       |          |       |        |       |
|            | $\tau_1$     | 7.60    | $A_1$ | 39415.16 | 38.35 | 5.760  | 1.006 |
|            | $\tau_2$     | 36.69   | $A_2$ | 5398.37  | 25.37 |        |       |
|            | $\tau_3$     | 212.03  | $A_3$ | 722.14   | 19.61 |        |       |
|            | $\tau_4$     | 1116.43 | $A_4$ | 116.64   | 16.68 |        |       |
| <b>(d)</b> | <b>CPB8</b>  |         |       |          |       |        |       |
|            | $\tau_1$     | 8.88    | $A_1$ | 32877.30 | 22.44 | 20.743 | 1.130 |
|            | $\tau_2$     | 43.67   | $A_2$ | 7835.22  | 26.31 |        |       |
|            | $\tau_3$     | 219.41  | $A_3$ | 1528.69  | 25.79 |        |       |
|            | $\tau_4$     | 1143.84 | $A_4$ | 289.61   | 25.47 |        |       |
| <b>(e)</b> | <b>CPB10</b> |         |       |          |       |        |       |
|            | $\tau_1$     | 6.11    | $A_1$ | 39409.06 | 59.86 | 0.967  | 0.951 |
|            | $\tau_2$     | 26.28   | $A_2$ | 3422.65  | 22.36 |        |       |
|            | $\tau_3$     | 134.19  | $A_3$ | 350.86   | 11.71 |        |       |
|            | $\tau_4$     | 591.61  | $A_4$ | 41.28    | 6.07  |        |       |
| <b>(f)</b> | <b>CPB12</b> |         |       |          |       |        |       |
|            | $\tau_1$     | 6.11    | $A_1$ | 41522.04 | 72.53 | 0.667  | 0.930 |
|            | $\tau_2$     | 32.96   | $A_2$ | 2043.72  | 19.98 |        |       |
|            | $\tau_3$     | 249.29  | $A_3$ | 63.38    | 4.73  |        |       |
|            | $\tau_4$     | 711.25  | $A_4$ | 85.36    | 2.76  |        |       |

**Table S2** Best fit parameters of PL decay curves for the blue emission bands **(a)** CPB2, **(b)** CPB4, **(c)** CPB6, **(d)** CPB8, **(e)** CPB10 and **(f)** CPB12 NPs.

| Sr. No.    | Decay time Parameters | Decay time Values (ns) | Coefficients | Coefficient values | Relative % | Average lifetime (ns) | Goodness of Fitting |
|------------|-----------------------|------------------------|--------------|--------------------|------------|-----------------------|---------------------|
| <b>(a)</b> | <b>CPB2</b>           |                        |              |                    |            |                       |                     |
|            | $\tau_1$              | 1.06                   | $A_1$        | 61815.91           | 84.67      | 0.303                 | 0.917               |
|            | $\tau_2$              | 5.16                   | $A_2$        | 2176.29            | 14.55      |                       |                     |
|            | $\tau_3$              | 35.76                  | $A_3$        | 16.92              | 0.78       |                       |                     |
| <b>(b)</b> | <b>CPB4</b>           |                        |              |                    |            |                       |                     |
|            | $\tau_1$              | 2.77                   | $A_1$        | 45576.74           | 64.63      | 0.642                 | 0.904               |
|            | $\tau_2$              | 6.13                   | $A_2$        | 10458.14           | 32.78      |                       |                     |
|            | $\tau_3$              | 37.48                  | $A_3$        | 135.22             | 2.59       |                       |                     |
| <b>(c)</b> | <b>CPB6</b>           |                        |              |                    |            |                       |                     |
|            | $\tau_1$              | 2.66                   | $A_1$        | 45202.47           | 63.05      | 0.507                 | 0.920               |
|            | $\tau_2$              | 5.63                   | $A_2$        | 11796.09           | 34.87      |                       |                     |
|            | $\tau_3$              | 32.37                  | $A_3$        | 122.38             | 2.08       |                       |                     |

|     |              |       |       |          |       |       |       |
|-----|--------------|-------|-------|----------|-------|-------|-------|
| (d) | <b>CPB8</b>  |       |       |          |       |       |       |
|     | $\tau_1$     | 3.21  | $A_1$ | 45623.24 | 64.28 | 0.490 | 1.102 |
|     | $\tau_2$     | 6.07  | $A_2$ | 12718.63 | 33.90 |       |       |
|     | $\tau_3$     | 1.38  | $A_3$ | 134.00   | 1.82  |       |       |
| (e) | <b>CPB10</b> |       |       |          |       |       |       |
|     | $\tau_1$     | 2.79  | $A_1$ | 40602.65 | 47.53 | 0.834 | 0.586 |
|     | $\tau_2$     | 9.77  | $A_2$ | 10549.66 | 43.32 |       |       |
|     | $\tau_3$     | 46.15 | $A_3$ | 427.07   | 9.15  |       |       |
| (f) | <b>CPB12</b> |       |       |          |       |       |       |
|     | $\tau_1$     | 3.08  | $A_1$ | 45309.37 | 67.74 | 1.489 | 1.126 |
|     | $\tau_2$     | 7.12  | $A_2$ | 8754.90  | 30.24 |       |       |
|     | $\tau_3$     | 60.31 | $A_3$ | 69.19    | 2.02  |       |       |
